# Supplementary material for: Integrated copy number and miRNA expression analysis in triple negative breast cancer of Latin American patients
Source: PubMed Central journal article supplement (PMC6817452; doi:10.18632/oncotarget.27250), 2019-10-22
Supplement: oncotarget-10-6184-s002.pdf [file oncotarget-10-6184-s002.pdf]

**Supplementary TABLE 1:** The 163 differentially expressed miRNAs among the TNBC and non-TNBC groups of the Latina patients' studied (presented by adj p-value).

| miRNAs          | Log2FC   | adj p-value | miRNAs           | Log2FC   | adj p-value |
|-----------------|----------|-------------|------------------|----------|-------------|
| hsa-miR-1299    | 1.241552 | 0.001       | hsa-miR-548u     | -0.50615 | 0.009       |
| hsa-miR-135b-5p | 1.928202 | 0.001       | hsa-miR-577      | 0.968527 | 0.009       |
| hsa-miR-3151    | -0.56665 | 0.001       | hsa-miR-1200     | 1.019496 | 0.01        |
| hsa-miR-323a-5p | -0.59037 | 0.001       | hsa-miR-184      | -0.5105  | 0.01        |
| hsa-miR-412     | 1.272243 | 0.001       | hsa-miR-500b     | 1.601524 | 0.01        |
| hsa-miR-555     | -0.59636 | 0.001       | hsa-miR-936      | 1.068307 | 0.01        |
| hsa-miR-638     | 1.897654 | 0.001       | hsa-miR-518c-3p  | 0.985269 | 0.011       |
| hsa-miR-2117    | 1.634233 | 0.002       | hsa-miR-943      | -0.45362 | 0.011       |
| hsa-miR-298     | -0.6011  | 0.002       | hsa-miR-1229     | -0.43502 | 0.012       |
| hsa-miR-299-3p  | 1.171332 | 0.002       | hsa-miR-139-5p   | -0.49376 | 0.012       |
| hsa-miR-496     | 1.133951 | 0.002       | hsa-miR-219-2-3p | -0.42312 | 0.012       |
| hsa-miR-499b-5p | -0.56337 | 0.002       | hsa-miR-3161     | 1.043253 | 0.012       |
| hsa-miR-518a-3p | 0.804529 | 0.002       | hsa-miR-599      | -0.516   | 0.012       |
| hsa-miR-548p    | -0.53097 | 0.002       | hsa-miR-671-3p   | -0.46463 | 0.012       |
| hsa-miR-556-3p  | -0.52457 | 0.002       | hsa-miR-720      | -3.97743 | 0.012       |
| hsa-miR-610     | 0.811232 | 0.002       | hsa-miR-200c-3p  | -2.44742 | 0.013       |
| hsa-miR-650     | -0.55002 | 0.002       | hsa-miR-323a-3p  | 0.628786 | 0.013       |
| hsa-miR-378b    | 2.259158 | 0.003       | hsa-miR-519b-5p  | 0.78908  | 0.013       |
| hsa-miR-765     | -0.56628 | 0.003       | hsa-miR-519c-5p  | 0.78908  | 0.013       |
| hsa-miR-1260a   | -3.30145 | 0.004       | hsa-miR-663b     | -1.3021  | 0.013       |
| hsa-miR-1286    | 1.241175 | 0.004       | hsa-miR-1197     | 0.727561 | 0.014       |
| hsa-miR-219-5p  | 1.167238 | 0.004       | hsa-miR-548k     | 0.790092 | 0.014       |
| hsa-miR-378g    | 1.050617 | 0.004       | hsa-miR-563      | -0.67788 | 0.014       |
| hsa-miR-568     | 0.924021 | 0.004       | hsa-miR-668      | -0.44523 | 0.014       |
| hsa-miR-802     | 0.959188 | 0.004       | hsa-miR-762      | 1.056555 | 0.014       |
| hsa-miR-944     | 1.133203 | 0.004       | hsa-miR-1227     | -0.45401 | 0.015       |
| hsa-miR-1263    | -0.47719 | 0.005       | hsa-miR-637      | -0.47987 | 0.015       |
| hsa-miR-2276    | 0.826868 | 0.005       | hsa-miR-378f     | 1.416524 | 0.016       |
| hsa-miR-421     | 2.280377 | 0.005       | hsa-miR-589-5p   | -0.43799 | 0.016       |
| hsa-miR-513a-3p | 1.148336 | 0.005       | hsa-miR-140-3p   | -0.49958 | 0.017       |
| hsa-miR-518d-5p | 1.550398 | 0.005       | hsa-miR-3144-5p  | -0.47359 | 0.017       |
| hsa-miR-520c-5p | 1.550398 | 0.005       | hsa-miR-379-5p   | 1.537607 | 0.017       |
| hsa-miR-526a    | 1.550398 | 0.005       | hsa-miR-514a-3p  | 0.70441  | 0.017       |
| hsa-miR-634     | 0.903045 | 0.005       | hsa-miR-876-5p   | -0.43982 | 0.017       |
| hsa-miR-708-5p  | 1.866813 | 0.005       | hsa-miR-378e     | -1.59139 | 0.018       |
| hsa-miR-1269a   | 0.860137 | 0.006       | hsa-miR-1305     | 2.21868  | 0.019       |
| hsa-miR-1322    | 1.258168 | 0.006       | hsa-miR-499a-3p  | 0.766943 | 0.019       |
| hsa-miR-4425    | -0.55469 | 0.006       | hsa-miR-1296     | -0.43391 | 0.02        |
| hsa-miR-607     | -0.4984  | 0.006       | hsa-miR-188-5p   | -0.92524 | 0.02        |
| hsa-miR-620     | -0.53163 | 0.006       | hsa-miR-601      | 2.680344 | 0.02        |
| hsa-miR-663a    | 2.60688  | 0.006       | hsa-miR-1181     | 0.672413 | 0.021       |
| hsa-let-7c      | -2.18788 | 0.007       | hsa-miR-1276     | 1.37538  | 0.021       |
| hsa-miR-193a-5p | -1.71617 | 0.007       | hsa-miR-1290     | 1.825019 | 0.021       |
| hsa-miR-125a-3p | 1.015675 | 0.008       | hsa-miR-3147     | -1.23049 | 0.021       |
| hsa-miR-1910    | -0.48273 | 0.008       | hsa-miR-4792     | 0.60057  | 0.022       |
| hsa-miR-323b-3p | -0.49473 | 0.008       | hsa-miR-96-5p    | 0.875759 | 0.022       |

**TABLE S1: cont.**

| <b>miRNAs</b>    | <b>Log2FC</b> | <b>adj p-value</b> | <b>miRNAs</b>    | <b>Log2FC</b> | <b>adj p-value</b> |
|------------------|---------------|--------------------|------------------|---------------|--------------------|
| hsa-miR-4286     | -3.08769      | 0.008              | hsa-miR-125b-5p  | -1.87456      | 0.023              |
| hsa-miR-505-3p   | 0.90293       | 0.008              | hsa-miR-18a-5p   | 1.053774      | 0.024              |
| hsa-miR-576-5p   | 0.659678      | 0.008              | hsa-miR-378c     | -0.42007      | 0.024              |
| hsa-miR-187-3p   | 3.642798      | 0.009              | hsa-miR-519b-3p  | -0.57555      | 0.024              |
| hsa-miR-323b-5p  | -0.48649      | 0.009              | hsa-miR-302d-3p  | -0.50028      | 0.026              |
| hsa-miR-548s     | -0.73219      | 0.026              | hsa-miR-1207-3p  | -0.45121      | 0.041              |
| hsa-miR-887      | -0.44763      | 0.027              | hsa-miR-1303     | 1.250427      | 0.041              |
| hsa-let-7e-5p    | -1.79934      | 0.028              | hsa-miR-34c-5p   | 0.487047      | 0.041              |
| hsa-miR-769-5p   | 1.013276      | 0.028              | hsa-miR-513b     | -0.46875      | 0.041              |
| hsa-let-7b-5p    | -2.24155      | 0.029              | hsa-miR-1185-5p  | 0.689035      | 0.042              |
| hsa-miR-1260b    | 0.788523      | 0.03               | hsa-miR-300      | 0.509251      | 0.043              |
| hsa-miR-548ak    | 0.724235      | 0.03               | hsa-miR-19b-3p   | 1.210221      | 0.044              |
| hsa-miR-1291     | -0.43629      | 0.031              | hsa-miR-324-3p   | 0.615431      | 0.045              |
| hsa-miR-3182     | -0.96625      | 0.031              | hsa-miR-30c-5p   | 1.250616      | 0.046              |
| hsa-miR-199a-3p  | -2.19484      | 0.032              | hsa-miR-593-3p   | 0.964414      | 0.046              |
| hsa-miR-199b-3p  | -2.19484      | 0.032              | hsa-miR-760      | 0.45456       | 0.046              |
| hsa-miR-367-3p   | 1.153571      | 0.032              | hsa-miR-1178     | -1.06657      | 0.047              |
| hsa-miR-410      | 0.743609      | 0.033              | hsa-miR-3190-5p  | 0.457707      | 0.047              |
| hsa-miR-1277-3p  | 0.873712      | 0.034              | hsa-miR-4454     | -2.72352      | 0.047              |
| hsa-miR-1284     | 0.660131      | 0.034              | hsa-miR-125a-5p  | -1.72745      | 0.048              |
| hsa-miR-26a-5p   | -1.85397      | 0.034              | hsa-miR-571      | -0.3322       | 0.048              |
| hsa-miR-29c-3p   | -1.54592      | 0.034              | hsa-miR-1233     | 0.963333      | 0.049              |
| hsa-miR-2052     | 0.704888      | 0.035              | hsa-miR-1268a    | 1.379848      | 0.049              |
| hsa-miR-129-2-3p | 0.76581       | 0.036              | hsa-miR-1275     | 0.610095      | 0.049              |
| hsa-miR-370      | 0.620461      | 0.036              | hsa-let-7d-5p    | -1.28678      | 0.05               |
| hsa-miR-548z     | 1.675082      | 0.036              | hsa-miR-1273g-5p | -0.38748      | 0.05               |
| hsa-miR-550a-5p  | 0.806703      | 0.036              | hsa-miR-147b     | 0.502335      | 0.05               |
| hsa-miR-191-5p   | -1.683        | 0.037              | hsa-miR-450b-5p  | 0.648325      | 0.05               |
| hsa-miR-378d     | -0.34324      | 0.037              | hsa-miR-1225-5p  | 1.160807      | <0.05              |
| hsa-miR-4741     | 0.952086      | 0.038              | hsa-miR-1258     | 1.331858      | <0.05              |
| hsa-miR-1912     | -0.45077      | 0.039              | hsa-miR-1302     | -0.56988      | <0.05              |
| hsa-miR-342-3p   | -1.50766      | 0.039              | hsa-miR-488-3p   | -0.62421      | <0.05              |
| hsa-miR-520e     | 1.140733      | 0.039              | hsa-miR-539-5p   | -0.68292      | <0.05              |
| hsa-miR-608      | -0.52486      | 0.04               | hsa-miR-567      | 1.63399       | <0.05              |
| hsa-let-7a-5p    | -2.09134      | 0.041              | hsa-miR-933      | -0.56734      | <0.05              |
| hsa-miR-1203     | -0.41278      | 0.041              |                  |               |                    |
